# Supplementary material
Source: Springer Nature journal article supplement (https://www.springermedizin.de/resource/supplementary/12943_2012_1133_MOESM12_ESM.pdf/9552566)

**A** Y-443 IgG<sub>1</sub>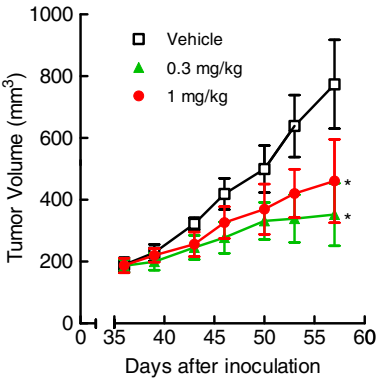**B** Y-443 IgG<sub>4</sub>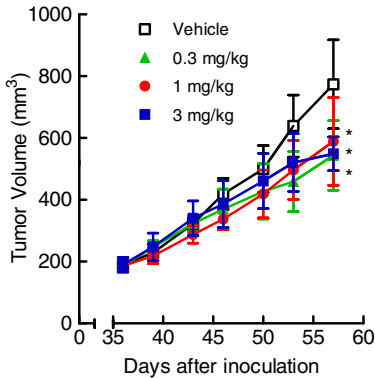

Supplement: MOESM12 [file 9552566]
